# Supplementary material for: Efficacy of the LED Red Light Therapy in the Treatment of Temporomandibular Disorders: Double Blind Randomized Controlled Trial
Source: Pain Res Treat. 2019 May 6;2019:8578703. doi: 10.1155/2019/8578703 (PMC6530159; doi:10.1155/2019/8578703)
Supplement: Supplementary Materials — This supplementary xle. file contains patients data about pain in the 2 study groups. [file 8578703.f1.xlsx]

## Sheet: group A
10	10	8	5
9	6	0	0
10	7	6	5
1	1	0	0
5	0	0	0
8	7	3	2
10	9	7	5
8	7	7	5
10	6	5	2
7	6	0	0
5	4	3	0
8	6	6	4
6	5	0	0
10	8	8	8
5	8	4	2
2	2	0	0
3	1	0	1
10	9	7	5
8	7	7	5
10	6	5	2
7	6	0	0
5	4	3	0
8	6	6	4
6	5	0	0
9	8	6	1
8	6	4	2	median
2.66145	2.5865	3.09408	2.40278	SD
7.2	5.76	3.64	2.24	mean

## Sheet: Group B
4	3	3	2
6	5	5	5
3	2	1	0
6	4	3	3
5	4	3	2
5	4	5	5
4	3	2	2
6	4	3	3
5	3	4	4
7	8	7	7
6	6	4	4
5	6	6	5
6	3	2	0
5	4	1	0
4	4	5	5
5	4	3	2
7	6	5	5
6	4	4	4
7	8	7	6
6	6	4	4
5	6	6	5
7	5	5	3
5	4	4	4
7	8	7	7
7	3	4	4
6	4	4	4	median
1.12101	1.67631	1.71561	1.95533	SD
5.56	4.68	4.12	3.64	mean
